# Supplementary material
Source: PubMed Central journal article supplement (PMC4492375)
Supplement: 10.1534_115.175661_genetics.115.175661-1.pdf [file 10.1534_115.175661_genetics.115.175661-1.pdf]

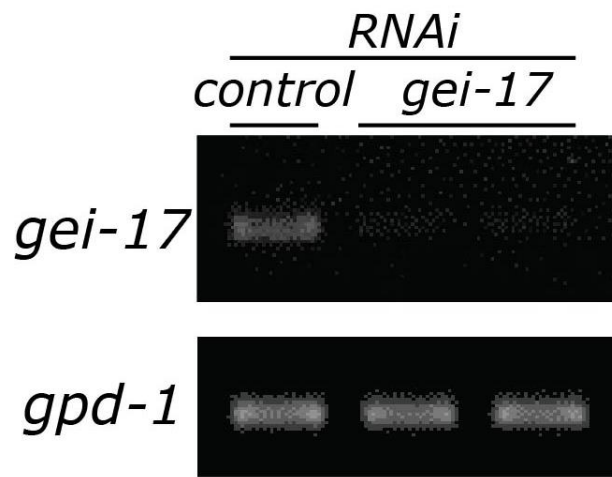

**Figure S1. RT-PCR analysis of RNA expression after *RNAi* depletion of *gei-17*.**

Single worm lysates were used for each reaction. The primer pairs used in amplification reactions span introns in *gei-17* or *gpd-1* to exclude genomic DNA contamination.

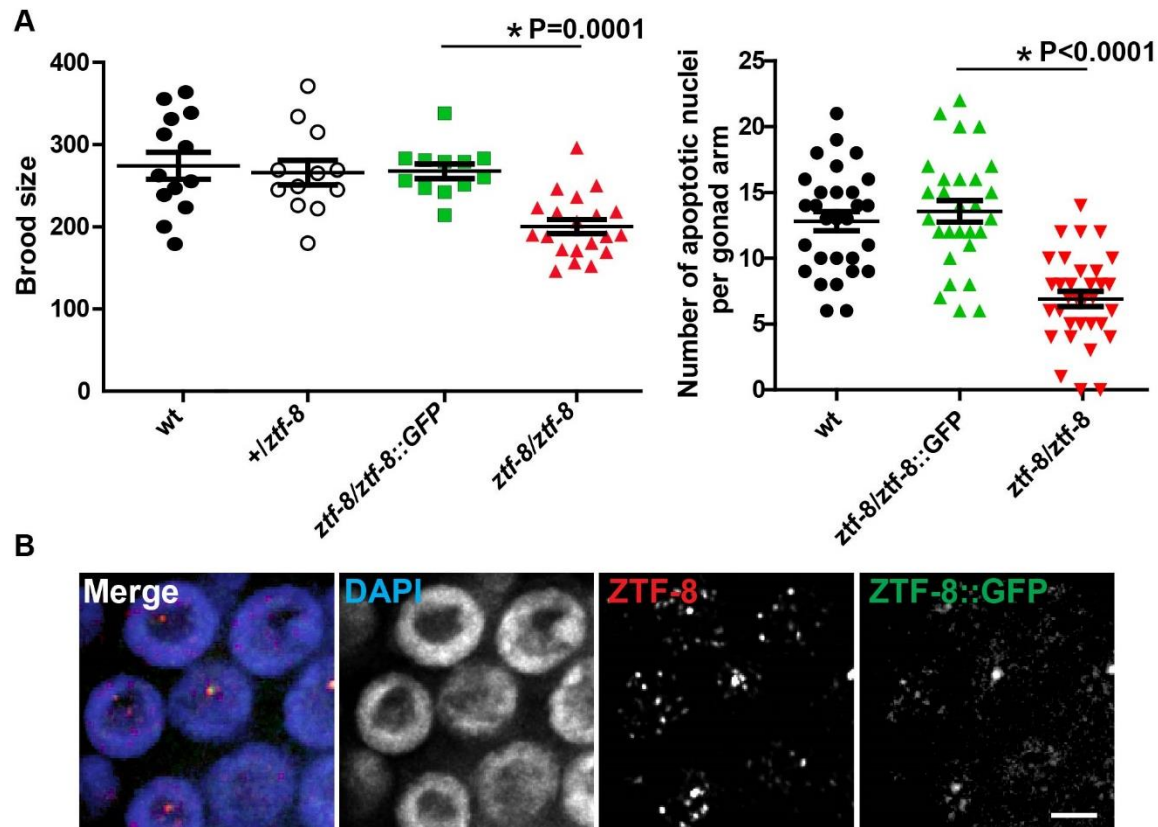

**Figure S2. GFP::FLAG-tagged ZTF-8 (*rj22*) is able to rescue the *ztf-8* null mutant phenotypes.**

**A.** Quantification of brood size and germline apoptosis in the indicated genotypes. Worms were treated with  $\gamma$ -IR (80 Gy) for apoptosis analysis. Asterisks indicate statistical significance compared to control by the Mann-Whitney test, 95% C.I. **B.** Co-staining with DAPI (blue) and an anti-ZTF-8 antibody (red) combined with detection of the endogenous GFP signal (green) in the ZTF-8::GFP::FLAG expressing worms. Of note, the endogenous GFP signal in this line is weaker than what is observed with an anti-GFP antibody. Bar, 2 $\mu$ m.

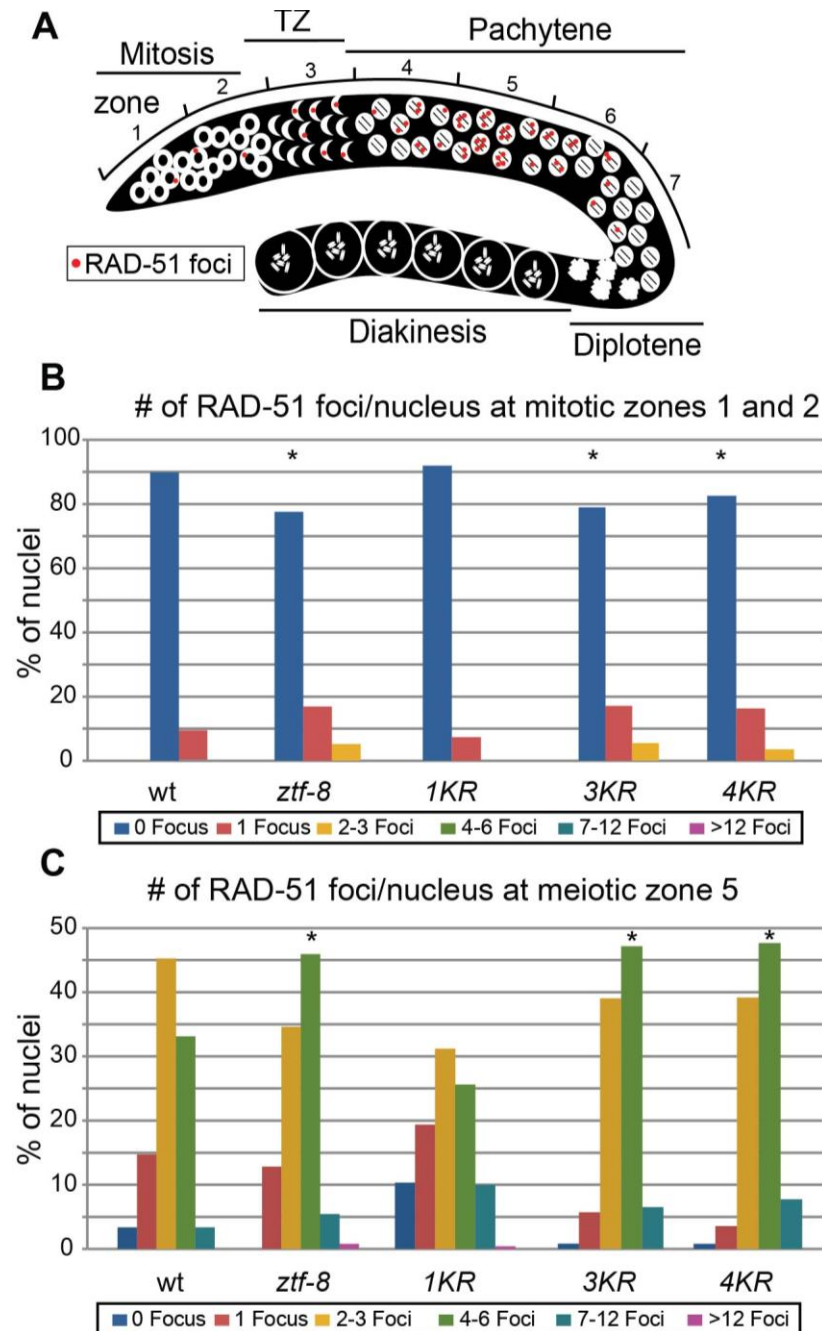

**Figure S3. Assessing DSB progression by quantitation of RAD-51 foci.**

**A.** Schematic representation of a *C. elegans* germline indicating the position of the seven zones scored for RAD-51 foci. **B-C.** Graphs depict the percentage of nuclei carrying from 0 to >12 RAD-51 foci (y-axis) either in the mitotic germline region (**B**, zones 1 and 2) or at mid-pachytene during meiosis (**C**, zone 5) for the indicated genotypes (x-axis). Asterisks indicate statistical significance compared to wild type by the Mann-Whitney test, 95% C.I.

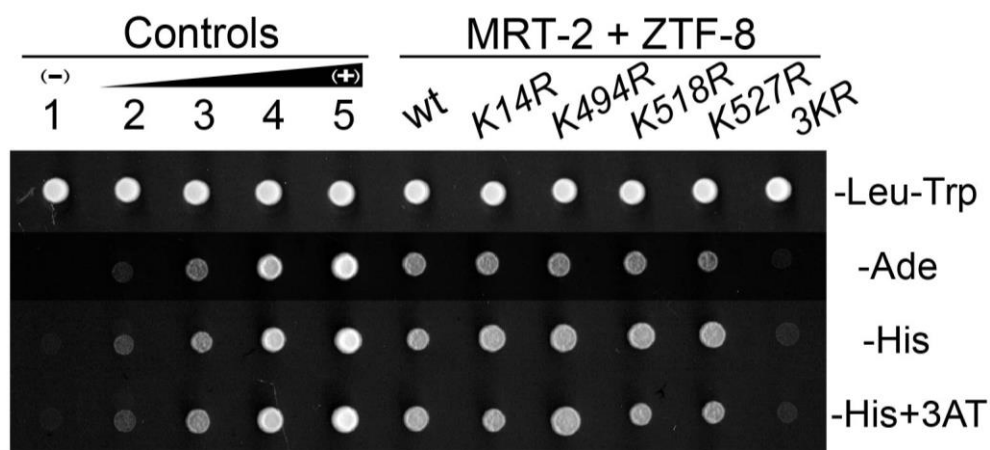

**Figure S4. Yeast two-hybrid analysis of the interaction between MRT-2/Rad1 and ZTF-8.**

Wild type full-length ZTF-8 as well as point mutants for the SUMOylation sites of ZTF-8 were tested for their interactions with MRT-2. K14R, K494R, K518R and K527R denote single point mutants, whereas 3KR denotes a construct carrying three mutations of K to R at amino acids 494, 518 and 527. Wild type and mutant ZTF-8 were fused to the DNA binding domain and full length MRT-2 was fused to the activation domain of GAL4. One negative (No. 1) and four positive controls (No. 2-5) were used as described in (37). Interactions were scored by growth on -Ade, -His and -His+3AT plates and compared to growth on -Leu-Trp control media.

## Supplemental Table

**Table S1. ZTF-8 interacting proteins identified by liquid chromatography-mass spectrometry (LC-MS) analysis.**

| Protein Name  | ZTF-8::GFP::FLAG | 4KR::GFP::FLAG | Control (GFP only) |
|---------------|------------------|----------------|--------------------|
| <b>UBC-9</b>  | 8                | Not detected   | Not detected       |
| <b>SMO-1</b>  | 36               | 6              | Not detected       |
| <b>GEI-17</b> | 8                | 6              | Not detected       |
| <b>MRT-2</b>  | 8                | Not detected   | Not detected       |
| <b>HUS-1</b>  | 7                | Not detected   | Not detected       |

Immunoprecipitations from ZTF-8::GFP::FLAG and 4KR::GFP::FLAG whole worm lysates with anti-GFP agarose beads were analyzed by LC-MS. Worm expressing only GFP under the *unc-17* promoter (*vsIS48[Punc-17::gfp]*) were used as a negative control. Experiment was performed in triplicate. The potential ZTF-8 interacting proteins that were identified in at least two of the experiments were listed. Numbers indicate the total mass spectra collected from three experiments.

## File S1

### Supplemental Experimental Procedures

#### RNA interference

Feeding RNAi experiments were performed at 20°C as described in [2]. The entire coding sequence of *gei-17* cloned into the pL4440 feeding vector was used for RNAi experiments. HT115 bacteria carrying the empty pL4440 vector were used as the control RNAi.

cDNA was produced from single-worm RNA extracts using the One step RT-PCR kit (USB). The effectiveness of RNAi was examined by assaying the expression of the transcript being depleted in four individual animals subjected to RNAi by feeding. Expression of the *gpd-1(T09F3.3)* transcript was used as a control.

#### Quantitative analysis for RAD-51 Foci

Quantitative analysis of RAD-51 foci was performed as in [3]. Five to nine germlines were scored for each genotype. The average number of nuclei scored per zone for a given genotype was as follows,  $\pm$  standard deviation: zone 1,  $n=151.3 \pm 32.3$ , zone 2,  $n=148.0 \pm 30.0$  and zone 5= $132.0 \pm 37.3$ . Statistical comparisons between genotypes were performed using the two-tailed Mann-Whitney test, 95% confidence interval (C.I.).

#### Immunoprecipitation of mass spectrometry (LC-MS)

ZTF-8::GFP::FLAG transgenic *rj22* and control worms expressing only GFP under the *unc-17* promoter (*vsIS48[Punc-17::gfp]*) were lysed and prepared as described in the *In vivo* SUMOylation assay section. After incubating worm lysates with anti-GFP agarose beads (MBL International) over 12 hours at 4°C, binding proteins were immunoprecipitated and eluted as described in manufacturer's protocol and submitted for LC-MS/MS analysis at the Taplin MS Facility, Harvard Medical School (Dr. S. Gygi).

#### Supplemental References

1. Vidal, M., Brachmann, R.K., Fattaey, A., Harlow, E., and Boeke, J.D. (1996). Reverse two-hybrid and one-hybrid systems to detect dissociation of protein-protein and DNA-protein interactions. *Proceedings of the National Academy of Sciences of the United States of America* 93, 10315-10320.
2. Timmons, L., Court, D.L., and Fire, A. (2001). Ingestion of bacterially expressed dsRNAs can produce specific and potent genetic interference in *Caenorhabditis elegans*. *Gene* 263, 103-112.
3. Colaiacovo, M.P., MacQueen, A.J., Martinez-Perez, E., McDonald, K., Adamo, A., La Volpe, A., and Villeneuve, A.M. (2003). Synaptonemal complex assembly in *C. elegans* is dispensable for loading strand-exchange proteins but critical for proper completion of recombination. *Dev Cell* 5, 463-474.
