# Supplementary material
Source: PubMed Central journal article supplement (PMC4492375)
Supplement: 10.1534_115.175661_genetics.115.175661-3.pdf [file 10.1534_115.175661_genetics.115.175661-3.pdf]

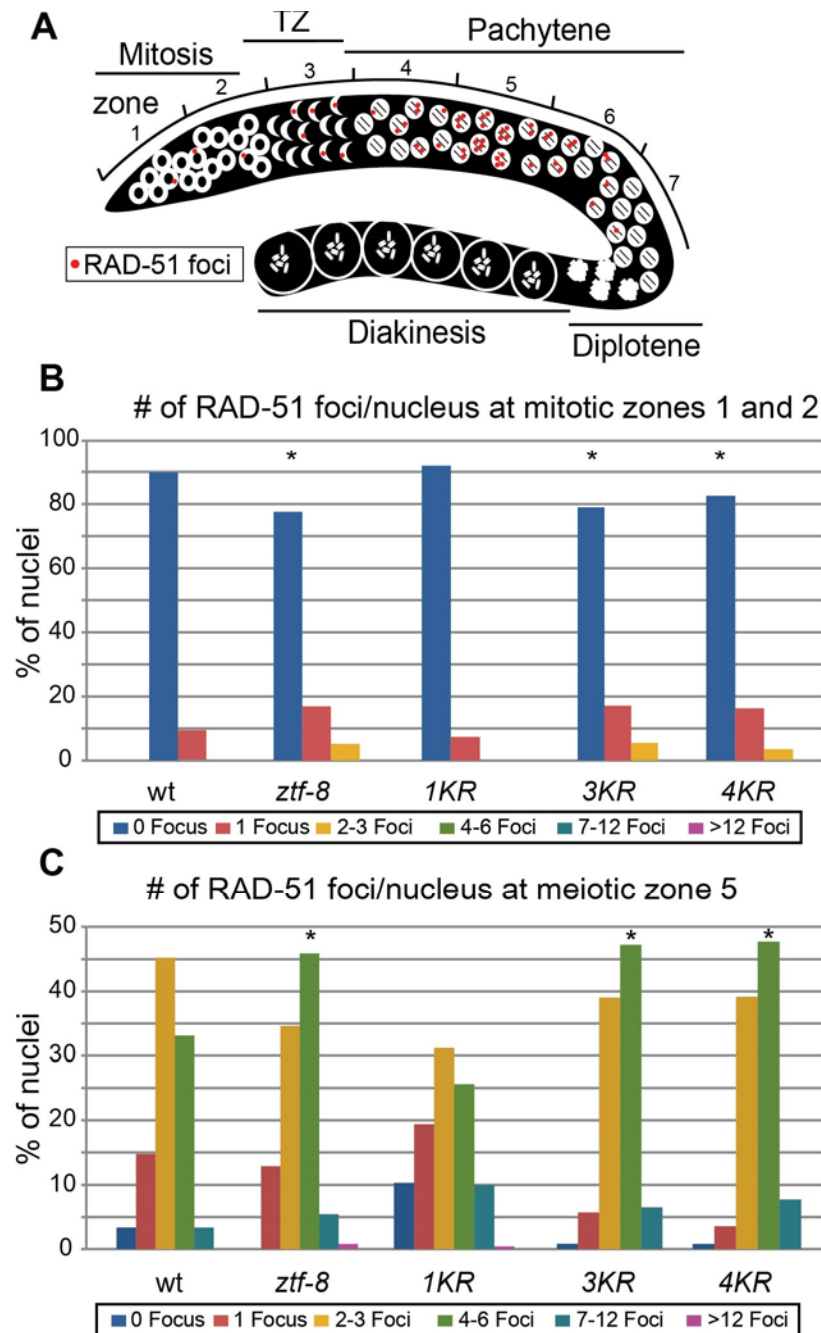

**Figure S3. Assessing DSB progression by quantitation of RAD-51 foci.**

**A.** Schematic representation of a *C. elegans* germline indicating the position of the seven zones scored for RAD-51 foci. **B-C.** Graphs depict the percentage of nuclei carrying from 0 to >12 RAD-51 foci (y-axis) either in the mitotic germline region (**B**, zones 1 and 2) or at mid-pachytene during meiosis (**C**, zone 5) for the indicated genotypes (x-axis). Asterisks indicate statistical significance compared to wild type by the Mann-Whitney test, 95% C.I.
