# Supplementary material
Source: PubMed Central journal article supplement (PMC4492375)
Supplement: 10.1534_115.175661_genetics.115.175661-5.pdf [file 10.1534_115.175661_genetics.115.175661-5.pdf]

## File S1

### Supplemental Experimental Procedures

#### RNA interference

Feeding RNAi experiments were performed at 20°C as described in [2]. The entire coding sequence of *gei-17* cloned into the pL4440 feeding vector was used for RNAi experiments. HT115 bacteria carrying the empty pL4440 vector were used as the control RNAi.

cDNA was produced from single-worm RNA extracts using the One step RT-PCR kit (USB). The effectiveness of RNAi was examined by assaying the expression of the transcript being depleted in four individual animals subjected to RNAi by feeding. Expression of the *gpd-1(T09F3.3)* transcript was used as a control.

#### Quantitative analysis for RAD-51 Foci

Quantitative analysis of RAD-51 foci was performed as in [3]. Five to nine germlines were scored for each genotype. The average number of nuclei scored per zone for a given genotype was as follows,  $\pm$  standard deviation: zone 1,  $n=151.3 \pm 32.3$ , zone 2,  $n=148.0 \pm 30.0$  and zone 5= $132.0 \pm 37.3$ . Statistical comparisons between genotypes were performed using the two-tailed Mann-Whitney test, 95% confidence interval (C.I.).

#### Immunoprecipitation of mass spectrometry (LC-MS)

ZTF-8::GFP::FLAG transgenic *rj22* and control worms expressing only GFP under the *unc-17* promoter (*vsIS48[Punc-17::gfp]*) were lysed and prepared as described in the *In vivo* SUMOylation assay section. After incubating worm lysates with anti-GFP agarose beads (MBL International) over 12 hours at 4°C, binding proteins were immunoprecipitated and eluted as described in manufacturer's protocol and submitted for LC-MS/MS analysis at the Taplin MS Facility, Harvard Medical School (Dr. S. Gygi).

#### Supplemental References

1. Vidal, M., Brachmann, R.K., Fattaey, A., Harlow, E., and Boeke, J.D. (1996). Reverse two-hybrid and one-hybrid systems to detect dissociation of protein-protein and DNA-protein interactions. *Proceedings of the National Academy of Sciences of the United States of America* 93, 10315-10320.
2. Timmons, L., Court, D.L., and Fire, A. (2001). Ingestion of bacterially expressed dsRNAs can produce specific and potent genetic interference in *Caenorhabditis elegans*. *Gene* 263, 103-112.
3. Colaiacovo, M.P., MacQueen, A.J., Martinez-Perez, E., McDonald, K., Adamo, A., La Volpe, A., and Villeneuve, A.M. (2003). Synaptonemal complex assembly in *C. elegans* is dispensable for loading strand-exchange proteins but critical for proper completion of recombination. *Dev Cell* 5, 463-474.
