# Supplementary material
Source: PubMed Central journal article supplement (PMC4492375)
Supplement: 10.1534_115.175661_genetics.115.175661-6.pdf [file 10.1534_115.175661_genetics.115.175661-6.pdf]

## Supplemental Table

**Table S1. ZTF-8 interacting proteins identified by liquid chromatography-mass spectrometry (LC-MS) analysis.**

| Protein Name | ZTF-8::GFP::FLAG | 4KR::GFP::FLAG | Control (GFP only) |
|--------------|------------------|----------------|--------------------|
| UBC-9        | 8                | Not detected   | Not detected       |
| SMO-1        | 36               | 6              | Not detected       |
| GEI-17       | 8                | 6              | Not detected       |
| MRT-2        | 8                | Not detected   | Not detected       |
| HUS-1        | 7                | Not detected   | Not detected       |

Immunoprecipitations from ZTF-8::GFP::FLAG and 4KR::GFP::FLAG whole worm lysates with anti-GFP agarose beads were analyzed by LC-MS. Worm expressing only GFP under the *unc-17* promoter (*vsIS48[Punc-17::gfp]*) were used as a negative control. Experiment was performed in triplicate. The potential ZTF-8 interacting proteins that were identified in at least two of the experiments were listed. Numbers indicate the total mass spectra collected from three experiments.
